# Supplementary material for: Data Sources for Drug Utilization Research in Brazil—DUR-BRA Study
Source: Front Pharmacol. 2022 Jan 14;12:789872. doi: 10.3389/fphar.2021.789872 (PMC8805708; doi:10.3389/fphar.2021.789872)
Supplement: Supplementary file 2 [file DataSheet2.xlsx]

## Sheet: TableS1
Table S1. Theory adopted for classifying/grouping Brazilian data sources
Classification	Characteristics	Observation
1. Automated Health Care Databases	The data has been captured in an automation fashion, often electronically.	They offer protection against some biases introduced by direct observation of research participants or self-reporting of information.
	The informatio in this kind of database is only captured when an individual has an encounter with the health care system.
1.1 Administrative Claims Data	Claims that are required by health plans for payment or reimbursement for covered services.	They can include a variety of different health care services, including outpatient medical office visits, inpatient hospitalizations, prescription drug events, and durable medical equipment. Also they have other information as medical diagnoses and baseic demographic information (age, gender, race, etc.)
	Claims submitted for services reimbursed under medicaid or medicare are examples of data from public sector. (It is what happens in SUS)	There is the turnover rate of individuals in health plans. In Brazil this problems that we have is when the patient care by a supplementary health services. Our health system is different from others country because when the public health can't care the population, the citizen can use a supplementary health services.
	They usually need a process of data linkage that allows separate data sources to be combined into one cohesive database. (In our case the Greenplumb from DATASUS and others from FioCruz (CIDACS and ICICT)	Changes in coding practices are another potential challenge with administrative claims data that are particularly important when considering studies that cover many years. In Brazil we have this problem not only for the change of codes, but with more than one kind of coding. The public health has one kind of code that is called SIGTAP, on the other hand the private sector has two kinds of code TU…
1.2 Other Transactional and Operational Data	Data that are collected as the result of activites that support the provision of a service, such as medical care, can be generally referred to as transactional or operational data.	Administrative claims data is a subset of the transactional and operational data, but they are so specific and important that it deserves to be a classification in itself.
	Data from these transactional system (Hospital Information System, e.g.) are often avaiable in near real-time fashion because they come form systems used to support the operations of the health care organization.	In case of medications, because in Brazil we don't need prescription for everything and they are not a eletronic prescription it's not possible to know all the medication that the patient is taking. Even in the hospital sometimes they say to bring the drug from home because they don't have some kind of medications.
		Transactional data can also be found outside of health systems (sales data, e.g.).
2. Eletronic Medical Records	Eletronic access to information about care provided to an individual over time - eletronic clinical notes.
3. National Surveys or datasets	Some governments, institutions and studies make selected data avaiable for research purposes, this kind of data are call as national survey or datasets.	In Brazil the governement is making this data available as open data.
4. Adverse Event Reporting Systems	Reports of adverse events associated with, or thought to be associated with, the use of drugs can be an important source of data for medication safety studies.
5. Others sources	Any database that do not fit into the previous categories that can be useful in pharmacoepidemiologic studies.
Adapted from Yang & West-Strum, 2013.

## Sheet: TableS2
Table S2 - Consensus process to define the final list of data sources to be characterized
2018-08-01		2019-02-01		2019-07-01		2019-08-01		2020-08-20		Dez-20
		APAC-SIA		APAC-SIA		APAC-SIA		APAC-SIA		APAC-SIA
APAC - SIA SUS		APAC-ONCO		APAC-ONCO		APAC-ONCO		APAC-ONCO		APAC-ONCO
BPS		BPS		BPS		BPS		BPS		BPS
BANCOS TJ ESTADOS		BANCOS TJ ESTADOS		BANCOS TJ ESTADOS		BANCOS TJ ESTADOS		BANCOS TJ ESTADOS
CIDACS
CMED
CONITEC
DATAVISA
FARMÁCIA POPULAR		FARMÁCIA POPULAR		FARMÁCIA POPULAR		FARMÁCIA POPULAR		FARMÁCIA POPULAR		FARMÁCIA POPULAR
HORUS		HÓRUS		HÓRUS		HÓRUS		HÓRUS		HÓRUS
NOTIVISA		NOTIVISA/VIGIMED		NOTIVISA/VIGIMED		NOTIVISA/VIGIMED		NOTIVISA/VIGIMED		NOTIVISA/VIGIMED
PCDT
REBEC
REGISTROS ANVISA
SARGE SUS
SAUDE LEGIS
SIA-SUS		SIA-SUS		SIA-SUS		SIA-SUS		SIA-SUS		SIA-SUS
SIADI
SIAFI		SIAFI		SIAFI		SIAFI		SIAFI		SIAFI
SIASG		SIASG		SIASG		SIASG		SIASG/SISME		SIASG/SISME
SIClON		SICLOM		SICLOM		SICLOM		SICLOM		SICLOM
SIH-SUS		SIH-SUS e SIHD		SIH-SUS e SIHD		SIH-SUS e SIHD		SIH-SUS/SIHD		SIH-SUS/SIHD
SIM
SINAN		SINAN		SINAN		SINAN		SINAN		SINAN
SINITOX		SINITOX		SINITOX		SINITOX		SINITOX		SINITOX
SIOPS		SIOPS		SIOPS		SIOPS		SIOPS		SIOPS
SISME						SISME		SISME
SIVEP*		SIVEP		SIVEP		SIVEP		SIVEP		SIVEP
SNGPC		SNGPC		SNGPC		SNGPC		SNGPC		SNGPC
VIGIACCES
VIGIBASE
VISALEGIS
31		Cancer Information Systems		Cancer Information Systems		SISCAN - SISCOLO/SISMAMA Cancer Information Systems		SISCAN - SISCOLO/SISMAMA Cancer Information Systems
		CIHA		CIHA		CIHA		CIHA		CIHA
		DATATOX®		DATATOX®		DATATOX®		DATATOX®		DATATOX®
		Dose Certa		Dose Certa		Dose Certa		Dose Certa
		E-SUS AB (antigo SISHiperdia)		E-SUS AB (antigo SISHiperdia)		E-SUS AB (antigo SISHiperdia)		E-SUS AB (antigo SISHiperdia)		E-SUS AB (antigo SISHiperdia)
		e-SUS-SAMU		e-SUS-SAMU		e-SUS-SAMU		e-SUS-SAMU
		Farmácia Cidadã		Farmácia Cidadã		Farmácia Cidadã		Farmácia Cidadã		Farmácia Cidadã
		Farmácia da Bahia		Farmácia da Bahia		Farmácia da Bahia		Farmácia da Bahia
		PERIweb		PERIweb		PERIweb		PERIweb		PERIweb
		PMAQ		PMAQ		PMAQ		PMAQ
		PNAUM		PNAUM		PNAUM		PNAUM		PNAUM
		PNS		PNS		PNS		PNS		PNS
		S-CODES		S-CODES		S-CODES		S-CODES		S-CODES
		SI - PNI		SI - PNI		SI - PNI		SI - PNI		SI - PNI
		SIAB		SIAB		SIAB		SIAB/SISAB		SIAB/SISAB
		SIDEC		SIDEC		SIDEC		SIDEC
		SIGAF		SIGAF		SIGAF		SIGAF		SIGAF
		SISPRENATAL		SISPRENATAL		SISPRENATAL		SISPRENATAL		SISPRENATAL
		VIGITEL		VIGITEL		VIGITEL		VIGITEL		VIGITEL
		36		36		BNAFAR		BNAFAR		BNAFAR
						AGHU		AGHU		AGHU
						CMD		CMD		CMD
						40		APURASUS		APURASUS
								Coagulopatias		Coagulopatias
Legend:								DSTAIDS-APP_VIVA_BEM		DSTAIDS-APP_VIVA_BEM
Data sources included over the process								Micronutrientes		Micronutrientes
Data sources excluded								SIASI		SIASI
Data sources grouped into one								SITE-TB		SITE-TB
										APP Connectsus
								37		SAMMED
										38
*Sivep havia sido excluido no inicio e incluido na minha revisao de dezembro/20. Deixo ela como incluida desde o inicio.								Numero usado no resumo ISPE 2020 - 2 bases foram posteriormente reagupadas - APAC e SISME		Ultima revisao realizada com Jupiter em 02-dez-20 Ivan Z. Inclui mais SAMMED.
INCLUDED - Final list in alphabetical order 28-12-20		EXCLUDED		REASONS FOR EXCLUSION				REASONS FOR EXCLUSION - Grouped
AGHU		CIDACS		Linkage center				Individual institutions
APURASUS		CMED		Medicine Market Regulation Chamber				Names or codes of medications not available
BNAFAR		CONITEC		National Committee for Technology Incorporation				Names or codes of medications not available
BPS		DATAVISA		System of Products and Services under Sanitary Surveillance				Names or codes of medications not available
CIHA		PCDT		National guideline system				Names or codes of medications not available
CMD		REBEC		Brazilian Registry of Clinical Trials				Names or codes of medications not available
Coagulopatias		REGISTROS ANVISA		System of Products and Services under Sanitary Surveillance				Names or codes of medications not available
Conecte SUS - APP		SARGE SUS		Strategic Management support room				Names or codes of medications not available
DATATOX®		SAUDE LEGIS		Legislation research system				Names or codes of medications not available
E-SUS AB (antigo SISHiperdia)		SIADI		Inmetro's Individual Performance Assessment System				Names or codes of medications not available
Farmácia Cidadã		SIM		Vital statistics system				Names or codes of medications not available
FARMÁCIA POPULAR		VIGIACCES		Former notivisa				Names or codes of medications not available
HÓRUS		VIGIBASE		Former notivisa				Names or codes of medications not available
Micronutrientes		VISALEGIS		Health Surveillance Legislation System				Names or codes of medications not available
NOTIVISA/VIGIMED		SISCAN - SISCOLO/SISMAMA Cancer Information Systems		National information systems for cervical and breast cancer				Names or codes of medications not available
PERIweb		BANCOS TJ ESTADOS		System of the Court of Justice State of São Paulo				Names or codes of medications not available
PNAUM		Dose Certa		System of Pharmacy Units				Names or codes of medications not available
PNS		e-SUS-SAMU		System of the Mobile Emergency Care Service				Names or codes of medications not available
S-CODES		Farmácia da Bahia		Drug manufacturer				Individual institutions
SI-PNI		PMAQ		A governmental quality program system				Names or codes of medications not available
SIAFI		SIDEC		Purchasing platform				Names or codes of medications not available
SIASG/SISME		APAC-SIA		Databases included in sia-sus				Names or codes of medications not available
SIASI		APAC-ONCO		Databases included in sia-sus				Names or codes of medications not available
SIA-SUS		23
SICLOM
SIGAF
SIH-SUS/SIHD
SINAN
SINITOX
SIOPS
SISAB (antigo SIAB)
SISPRENATAL
SITE-TB
SIVEP
SNGPC
VIGITEL
VIVA BEM - APP
SAMMED
38

## Sheet: TableS3
Table S3. Description of each data source and rationale for grouping within respective category
Classification	Subclassification	Data source/database acronym in Portuguese	Full name in Portuguese	Full name translated to English	Description	Justification for classification
Automated Databases	Administrative Claim data	FARMÁCIA POPULAR	Sistema de Co-Pagamento para Expansão da Farmácia Popular do Brasil	Co-Payment System for the Expansion of Popular Pharmacy in Brazil	The Popular Pharmacy Program of Brazil was created with the objective of offering the population another alternative of access to medicines considered essential. Free medications are offered for hypertension (high blood pressure), diabetes and asthma, as well as medicines with up to 90% discount for dyslipidaemia (high cholesterol), rhinitis, Parkinson's, osteoporosis and glaucoma. Also through t…	claim pharmacy
Automated Databases	Administrative Claim Data	SIA-SUS	Sistema de Informações Ambulatoriais do SUS	SUS Outpatient Information System	It was implemented in 1995 and records outpatient visits through the Ambulatory Production bulletin. The data processing occurs in a decentralized way, in which each state and municipality, duly qualified, can register, program, process and pay for the production of its health facilities under its management.	claim ambulatory
Automated Databases	Administrative Claim Data	SIH-SUS	Sistema de Informação Hospitalar	SUS Hospital Information System	The purpose of the AIH (SIHSUS System) is to record all hospital admissions that were funded by SUS, and from this processing, generate reports so that managers can make payments from health facilities. SIH is the large system where all management takes place - it generates files for consultation - it has medicine only for specific procedures. SIHD is the system used to feed the SIH, here AIH are…	claim hospital
Automated Databases	Other Transactional and Operational Data	Farmácia Cidadã	Regula Saude - Farmácia Cidadã	Health Regulation-The Citizen Pharmacy Project	The Citizen Pharmacy Project expands the access to medicines and improve the quality of services offered to users of high-cost medicines in the state. The medications are requested through administrative process that will be forwarded to a Pharmacology and Therapeutics Commission for evaluation of the attached documents, according to the Clinical Protocols and Therapeutic Guidelines. If the inclu…	The data has been captured in an automation fashion, often electronically. Also it is a transactional data because the data are collect during a health service event.
Automated Databases	Other Transactional and Operational Data	VIVA BEM - APP	Viva Bem	Live well	Application for Monitoring and improving the adhesion of PLWHA. Smartphone application that provides in a practical, playful, interactive and intuitive way the monitoring of withdrawals and taking of antiretroviral drugs to improve the adhesion of PLWHA People Living with HIV and AIDS for the use of users, with identified profiles.	The data has been captured in an automation fashion, often electronically. Also it is a transactional data because the data are collect during a health service event.
Automated Databases	Other Transactional and Operational Data	HÓRUS	Sistema Nacional de Gestão da Assistência Farmacêutica	National Pharmaceutical Assistance Management System	HORUS is a national system for the management of online pharmaceutical services implemented by the Ministry of Health of Brazil, which allows the control and distribution of medicines available in the Unified Health System. The objective is to enable the registration of the medicines that the patient uses, facilitating the electronic management of inventory, expiration dates, screening and pharma…	The data has been captured in an automation fashion, often electronically. Also it is a transactional data because the data are collect during a health service event.
Automated Databases	Other Transactional and Operational Data	SIGAF	Sistema Integrado de Gerenciamento da Assistência Farmacêutica	Integrated Pharmaceutical Assistance Management System	SIGAF is a software which allows inventory registration and drug dispensing history, and allows the registration of clinical and laboratory data of patients (pharmaceutical care) in the state of Minas Gerais. It is similar to HORUS.	The data has been captured in an automation fashion, often electronically. Also it is a transactional data because the data are collect during a health service event.
Automated Databases	Other Transactional and Operational Data	Micronutrientes	Sistema de Micronutrientes	Micronutrients System	Control and monitoring system for the distribution of supplements linked to the National Vitamin A, Iron and NutriSUS.	The data has been captured in an automation fashion, often electronically. Also it is a transactional data because the data are collect during a health service event.
Automated Databases	Other Transactional and Operational Data	SIASI	Sistema de Informação da Atenção da Saúde Indígena	Indigenous Health Care Information System	The SIASI system (Indigenous Health Care Information System) is organized in 8 modules and groups epidemiological data from 34 health districts. The purpose of the data collected is to monitor the health of indigenous communities, covering deaths, births, morbidity, immunization, production of services, human resources and infrastructure. The morbidity module seems to be the most suitable for stu…	The data has been captured in an automation fashion, often electronically. Also it is a transactional data because the data are collect during a health service event.
Automated Databases	Other Transactional and Operational Data	SINAN	Sistema de Informação de Agravos de Notificação	Information System on Diseases of Notification	The Information System for Notifiable Diseases - Sinan contains the data for notification and investigation of cases of diseases and conditions that appear on the national list of compulsory notification diseases. States and municipalities may include other major health problems in their region. In some diseases, there is information about the use of a certain medication, such as cholera, whether…	The data has been captured in an automation fashion, often electronically. Also it is a transactional data because the data are collect during a health service event.
Automated Databases	Other Transactional and Operational Data	SI-PNI	Sistema de Informações do Programa Nacional de Imunizações	National Immunization Program Information System	It registers, by age group, the immunobiological doses applied and calculates the vaccine coverage; Provides information about routine and campaigns, dropout rate and sending immunization bulletins; Manages the visits, inventory and distribution of immunobiologicals; Enables the control of physical and technical losses of vaccines in all instances; Identifies the reactions that are occurring post…	The data has been captured in an automation fashion, often electronically. Also it is a transactional data because the data are collect during a health service event.
Automated Databases	Other Transactional and Operational Data	SITE-TB	Sistema de Informacao de Tratamentos Especiais de Tuberculose	Tuberculosis Special Treatment Information System	It allows the notification and monitoring of TB cases that have an indication for special treatments, either due to the occurrence of adverse reactions, toxicity or certain comorbidities that make it impossible to use the Basic Scheme, or by resistances. The system also allows the notification and monitoring of cases of non-tuberculous mycobacteriosis (NTM). These cases must be attended to and fo…	The data has been captured in an automation fashion, often electronically. Also it is a transactional data because the data are collect during a health service event.
Automated Databases	Other Transactional and Operational Data	SICLOM	Sistema Gerencial de Controle Logístico de Medicamentos	Management System for Logistic Control of Medicines	SICLOM was created with the objective of logistical management of antiretroviral drugs. The system allows the Department of STD, AIDS and Viral Hepatitis to keep up to date in relation to the supply of medicines to patients on ART, in the various regions of the country. The information is used to control ARV stocks and distribution, as well as to obtain clinical and laboratory information on AIDS…	Transactional data relates to the transactions of the organization and includes data that is captured, for example, when a product is sold or purchased.
Automated Databases	Other Transactional and Operational Data	SISAB	Sistema de Informação em Saúde para a Atenção Básica	Health Information System for Primary Care	Health Information System for Primary Care (SISAB) was established by Ordinance GM / MS No. 1,412, of July 10, 2013, becoming the Primary Care information system in force for the purposes of financing and adherence to programs and strategies of the National Primary Care Policy, replacing the Primary Care Information System (SIAB). With this system it will be possible to obtain information on the …	• Data that are collected as the result of activites that support the provision of a service, such as medical care, can be generally referred to as transactional or operational data. • Consolidation. Operational data - An operational data store (ODS) is a central database that provides a snapshot of the latest data from multiple transactional systems for operational reporting. It enables organiza…
Automated Databases	Other Transactional and Operational Data	SIVEP-Gripe	Sistema de informação de vigilância epidemiológica da gripe	Influenza epidemiological surveillance information system	The tool is used for Influenza Sentinel Surveillance for Influenza-like Syndrome (ILS) and Severe Acute Respiratory Syndrome (SARS) in Intensive Care Units. It also performs Universal Surveillance for Severe Acute Respiratory Syndrome (SARS) for hospitalized cases and deaths due to SARS. Monitoring of hospitalizations (SIH) and mortality (SIM) due to these agents is performed through ICD-10 from …	• Data that are collected as the result of activites that support the provision of a service, such as medical care, can be generally referred to as transactional or operational data. • Consolidation. Operational data - An operational data store (ODS) is a central database that provides a snapshot of the latest data from multiple transactional systems for operational reporting. It enables organiza…
Automated Databases	Other Transactional and Operational Data	CIHA	Sistema de Comunicação de Informação Hospitalar e Ambulatorial	Hospital and Ambulatory Information Communication System	The Hospital Internment Communication is a health information system, used by the Ministry of Health and the National Supplementary Health Agency, to monitor and monitor hospitalizations in all public and private hospitals in the country, whether or not members of the SUS. Provides data on care network (Health Plans), population epidemiology and clinical practices.	• Data that are collected as the result of activites that support the provision of a service, such as medical care, can be generally referred to as transactional or operational data. • Consolidation. Operational data - An operational data store (ODS) is a central database that provides a snapshot of the latest data from multiple transactional systems for operational reporting. It enables organiza…
Automated Databases	Other Transactional and Operational Data	S-CODES (old SCJ-SP)	Sistema de Coordenacao de Demandas Estrategicas - SP	Strategic Demand Coordination System - SP	The Codes System registered the lawsuits of all Regional Health Departments (DRS), administrative divisions of the State Department of Health of São Paulo. This system controls and managements of legal demands, subsequently implemented for administrative demands and pre-procedural instances.	The data has been captured in an automation fashion, often electronically, but it is not collect during a health service event.
Automated Databases	Other Transactional and Operational Data	SIAFI	WebService Sistema Integrado de Administração Financeira	Integrated Financial Management System Webservice	SIAFI is an accounting system whose purpose is to carry out all the processing, control and financial, patrimonial and accounting execution of the Brazilian federal government. The system was developed by the Federal Data Processing Service. It has all the budget execution of the federal government. Probably it has information per item of excution and appears to have no disaggregated data.	The data has been captured in an automation fashion, often electronically, but it is not collect during a health service event.
Automated Databases	Other Transactional and Operational Data	SNGPC	Sistema Nacional de Gerenciamento de Produtos Controlados	National Controlled Products Management System	It is a Brazilian computerized system that aims to control the sale of special control drugs such as anorectics, antibiotics and antidepressants. The system allows to establish links from the manufacturing to the final consumer.	The data has been captured in an automation fashion, often electronically, but it is not collect during a health service event.
Automated Databases	Other Transactional and Operational Data	SIOPS	Sistema de Informações sobre Orçamentos Públicos em saúde	System Information System on Public Health Budgets	SIOPS is a system made available through the Internet that aims to calculate total revenues and expenditures on public health actions and services. They provide inputs for the improvement of management, diagnoses of the sector and formulation of public policies; Arrange for civil society and health councils to exercise control over public management by making data available to the population.	• Data that are collected as the result of activites that support the provision of a service, such as medical care, can be generally referred to as transactional or operational data. • Consolidation. Operational data - An operational data store (ODS) is a central database that provides a snapshot of the latest data from multiple transactional systems for operational reporting. It enables organiza…
Automated Databases	Other Transactional and Operational Data	Coagulopatias	Coagulopatias WEB	WEB Coagulopathies	System responsible for the unified registry of patients with hereditary coagulopathies and distribution of medicines for infusion, in Brazil.	• Data that are collected as the result of activites that support the provision of a service, such as medical care, can be generally referred to as transactional or operational data. • Consolidation. Operational data - An operational data store (ODS) is a central database that provides a snapshot of the latest data from multiple transactional systems for operational reporting. It enables organiza…
Automated Databases	Other Transactional and Operational Data	BNAFAR	Base Nacional de Dados de Ações e Serviços da Assistência Farmacêutica no SUS	National Database of Pharmaceutical Services on SUS	The National Database of Pharmaceutical Services in SUS (BNAFAR) is the consolidation of the national data of ambulatorial drug consumption performed by the health centers of the Municipalities, States and Federal District and the Popular Pharmacy Program. Although Established on 2017, the database is still under development and should be launched in 2019. It will contain individualized data on t…	• Data that are collected as the result of activites that support the provision of a service, such as medical care, can be generally referred to as transactional or operational data. • Consolidation. Operational data - An operational data store (ODS) is a central database that provides a snapshot of the latest data from multiple transactional systems for operational reporting. It enables organiza…
Automated Databases	Other Transactional and Operational Data	APURASUS	Sistema de Apuração e Gestão de Custos do SUS	SUS Cost Calculation and Management System	The System for Calculating and Managing Costs SUS (APURASUS) is an information system developed by the Ministry of Health to assist in the process of calculating and managing costs in different SUS Health Units, in a standardized and structured way.	System to support the Ministry of Health in the management of costs in different SUS Health Units. The data has been captured in an automation fashion, often electronically, but it is not collect during a health service event.
Adverse Report Systems		Datatox	Sistema Brasileiro de Dados de Intoxicações	Brazilian Poisoning Data System	DATATOX is a computerized system for recording, tracking, storing, processing and retrieving data. Standardization of data will facilitate the comparison of clinical and epidemiological studies, product safety assessment (toxicovigilance and pharmacovigilance) and national assessment of the impact of toxic agents on the health of the population.	Adverse report system
Adverse Report Systems		NOTIVISA/VIGIMED	Sistema de Notificação em Vigilância Sanitária	National Notification System for Adverse Events and Technical Complaints /Sistema de Notificação de Eventos Adversos a Medicamentos	Notivisa is a computerized system developed by Anvisa- National Surveillance Agency Brazil- to receive notifications of incidents, adverse events) and technical complaints related to the use of products and services under sanitary surveillance. Vigimed is the new Anvisa system for reporting adverse drug events, including vaccines, which has been available since December 10, 2018. The adoption of …	Adverse report system
Adverse Report Systems		PERIweb	Sistema de Notificação Espontânea de Suspeita de Reação Adversa a Medicamento ou Desvio da Qualidade de Medicamento do Estado de São Paulo	Spontaneous Notification System of Suspected Adverse Reaction to Medication or Deviation from the Quality of Medication in the State of São Paulo	Periweb is the Electronic Notification System of the Health Surveillance Center of the São Paulo State Department of Health (CVS-SES / SP). In addition to reports of adverse drug events (reactions and quality deviations), the system receives notifications of medical devices, cosmetics and household cleaning products.	Adverse report system
Adverse Report Systems		SINITOX	Sistema Nacional de Informações Tóxico-Farmacológicas	National Poisoning Information System	SINITOX has as main attribution to coordinate the collection, compilation, analysis and dissemination of cases of intoxication and poisoning reported in the country. The registries are carried out by the National Network of Information Centers and Toxicological Assistance (Renaciat), composed of several units present in all regions of Brazil. The results of the work are disclosed annually.	Adverse report system
Electronic Medical Records (EMR)		AGHU	Aplicativo de Gestão para Hospitais Universitários	Management Application for University Hospitals	It is an application whose purpose is to support the standardization of assistance and administrative practices of Federal University Hospitals. It allows the creation of national indicators to facilitate the adoption of common improvement projects for these hospitals. The system is currently implemented in 40 University Hospitals across the country. Modules of pharmacy, patients, admissions, dia…	EMR
Electronic Medical Records (EMR)		e-SUS AB	e-SUS Atenção Básica	e-SUS Primary Care	e-SUS AB consists of two software systems that provide tools for the collection of data to be inserted in the SIAB: (1) Simplified Data Collection (CDS); (2) Electronic Health Record (PEC) and (3) Applications (App) for mobile devices, currently available: AD (Home Care) app. In this sense, the e-SUS AB systems were developed to meet the Primary Care work processes for the management of health ca…	EMR
Electronic Medical Records (EMR)		SISPRENATAL	Sistema de acompanhamento do programa de humanização no pré natal e nascimento	Monitoring system of the humanization program in prenatal and birth	SisPreNatal is a software developed for adequate follow-up of pregnant women included in the Pre-Natal and Nascimento Humanization Program (PHPN) of the Unified Health System. It presents the minimum set of procedures for adequate prenatal care, increasing efforts towards reduce maternal, perinatal and neonatal morbidity and mortality rates.	Clinical data from the atendence to a pregnant women.
Electronic Medical Records (EMR)		CMD	Conjunto Mínimo de Dados	Minimum Data Set	The Minimum Data Set (CMD) is a public database that collects data from all health facilities in the country in each health care contact, being part of the Electronic Health Registry (RES) and integrating the National Health Information System (SNIS). The CMD is under development and until 2020 should replace other nine systems used in the health care records, including APAC, AIH and BPA, unifyin…	CMD is the minimun clinical data set of a patient.
National Surveys or datasets		PNAUM	Pesquisa Nacional sobre Acesso, Utilização e Promoção do Uso Racional de Medicamentos no Brasil	National Survey on Access, Use and Promotion of the Rational Use of Medicines in Brazil	The general objective is to evaluate the access and rational use of medicines by the Brazilian population. Specifics objectives: To characterize the use of drugs for the most prevalent diseases. Characterize drugs according to the components of pharmaceutical care: primary care medicines, strategic drugs and drugs of the specialized component; Identify the ways and places of obtaining medicines i…	Survey data
National Surveys or datasets		PNS - 2013	Pesquisa Nacional de Saúde	National Health Survey	To produce data at the national level on the health situation and the lifestyles of the Brazilian population, as well as on health care, regarding access and use of health services, preventive actions, continuity of care, and financing of health care.	Survey data
National Surveys or datasets		VIGITEL - 2015	Vigilância de fatores de risco e proteção para doenças crônicas por inquérito telefônico	Surveillance of risk and protective factors for chronic diseases by telephone survey	It aims to monitor the magnitude of Noncommunicable Diseases and its factors and analyze their social, economic, behavioral and political determinants. Level of dissemination is national with details by municipalities through publications and internet. Information about medication use for hypertension and diabetes were included from 2015.	Survey data
Other Sources		BPS	Banco de Preços em Saúde	Health Price Bank	It is a system created by the Ministry of Health to record and make available information on public and private purchases of medicines and medical devices. Provide data that can subsidize social control over public spending on health. This database allows consulting by institution. Since December/2017, it is mandatory to supply the Health Price Bank (BPS) with information on all purchases of medi…	Costs of medicines and medical devices. Support database
Other Sources		Conecte SUS - APP	Conecte SUS	Connect SUS	It is an application that records the trajectory of those who seek care in the Unified Health System (SUS)	The Conect SUS is a eletronic medical record because it has a minimun clinical data set and also a transactional and operational data because it is possible to collect, process and store data from a event (e.g., vaccine data)
Other Sources		SAMMED	Sistema de Acompanhamento do Mercado de Medicamentos	Drug Market Monitoring System	The Medicines Market Monitoring System - SAMMED is the official database of the Brazilian pharmaceutical market, provided technically and operationally by Anvisa and maintained under the management of the Medicines Market Regulation Chamber (CMED).	Costs of medicines
Other Sources		SIASG/SISME*	Sistema Integrado de Administração de Serviços Gerais (compras net)	Integrated System of Administration of General Services (net purchases)	It is a web site, instituted. By the Ministry of Planning, Budget and Management - MP, to make available to the company, information regarding the tenders and contracting promoted by the Federal Government, as well as to allow the execution of electronic Procurement processes.	Transactional data relates to the transactions of the organization and includes data that is captured, for example, when a product is sold or purchased. This system captures the data from sales that the government has made, but it is not specific to health, so its an ohters sources.

## Sheet: TableS4
Table S4. Detailed characterization of data sources, according to their accessibility, geographic granularity, type, setting, and initial year of release
DATA SOURCES	AGHU	APURASUS	BNAFAR	BPS	CIHA	CMD	COAGULOPATIAS	Conecte SUS - APP	DATATOX	e-SUS AB	Farmácia Cidadã	FARMÁCIA POPULAR	HORUS	Micronutrientes	NOTIVISA/ VIGIMED	PERIweb	PNAUM	PNS	S-CODES	SAMMED	SI-PNI	SIAFI	SIASG/SISME	SIASI	SIA-SUS	SICLOM	SIGAF	SIH-SUS	SINAN	SINITOX	SIOPS	SISAB	SISPRENATAL	Site-TB	Sivep-gripe	SNGPC	VIGITEL	VIVA BEM - APP	TOTAL	38
Acessibility																																								%
Publicly and conveniently accessible on line				1	1	1								1	1		1	1			1				1			1	1	1	1	1	1		1	1	1		18	47.3684
Restricted pre-authorized protocol-only access	1																																						1	2.63158
Access limited to or dependent on country-specific legislation - Freedom of Information Act					1					1	1	1	1		1	1						1	1		1	1	1	1	1			1	1	1		1			18	47.3684
Available only researchers working in the institution (It is only people that is from the institution that provide the database)									1							1			1			1	1				1												6	15.7895
The process for obtaining data is not clear, without general regulation																																							0	0
Not accessible any way/ Data not available for public use		1	1				1	1												1				1														1	7	18.4211
Other: (specify)										Health managers in all levels have access to data																											2015 data in which we have information on medication use is not available yet.		0	0
Geographic granularity																																								0
National		1	1	1	1	1	1		1	1		1	1	1	1		1	1		1	1	1	1		1	1		1	1	1	1	1	1	1	1	1	1	1	31	81.5789
Regional (province, state, more than one city)	1	1	1		1	1	1	1	1	1	1	1	1	1	1	1	1	1	1	1	1	1		1	1	1	1	1	1	1	1	1	1	1	1	1	1	1	36	94.7368
Municipality (one city)																																							0	0
Organization multi-sited																																							0	0
Other (specify)																																							0	0
Sector of data source																																								0
Public health system	1	1	1			1	1			1	1	1	1	1								1	1	1	1	1	1	1				1	1	1					20	52.6316
Private sector																																				1			1	2.63158
Both				1	1			1	1						1	1	1	1	1	1	1								1	1	1				1		1	1	17	44.7368
Type of data source																																								0
Wholesaler																																							0	0
Pharmacy records			1		1		1	1			1	1	1	1							1				1	1	1					1				1		1	15	39.4737
Patient records	1				1		1	1		1										1				1	1			1				1	1	1				1	13	34.2105
Other (specify)		Costs		N/A - National Prices of medications approved by ANVISA		Procedures			Notification from Toxicological Information Centers						Notification from relatives, health professionals in all settings and patients are foreseen by Vigimed.	Notification from health professionals in all settings and Marketing Authorization Holder	survey patients	survey patients	lawsuits			It involves documents to carry out all the processing, control and financial, patrimonial and accounting execution of the Brazilian federal government.	Prices of medications						Surveillance system	Notification from ToXicological Information Centers	Costs with health				surveillance system		telephone survey with citizen	Mobile application by users	0	0
Setting of data source																																								0
Ambulatorial			1				1			1	1	1	1	1							1				1		1					1				1			12	31.5789
Hospital																												1											1	2.63158
Both (possible to separate)		1						1							1	1			1	1									1		1		1		1			1	11	28.9474
Both (not possible to separate)	1				1	1																		1		1				1				1					7	18.4211
Other (specify)				There is no distinction as to the destination of purchases. The purchases are made by the state and municipal institutions (Participation funds, prefectures, etc.) and made available in the bank with the identification of the purchasing institution.					N/A it is a system of notification								survey patients	survey patients				It involves documents to carry out all the processing, control and financial, patrimonial and accounting execution of the Brazilian federal government.	There is no distinction as to the destination of purchases. The purchases are made by the state and municipal institutions (Participation funds, prefectures, etc.) and made available in the bank with the identification of the purchasing institution.													Qualified professional prescription (doctor and dentist) provided in private sector pharmacies and drugstores	Collected in the homes of citizens It involves all kind of setting.		0	0
Type of data																																								0
Aggregate level		1		1		1	1		1			1		1	1			1	1	1	1	1	1	1	1	1		1	1	1	1	1	1			1	1		25	65.7895
Individual level	1		1		1			1		1	1		1		1	1	1	1							1		1	1	1				1	1	1	1		1	20	52.6316
Other (specify)				Prices - not aplicable															Lawsuits - not aplicable			puchase system	purchase system							Notification from ToXicological Information Centers									0	0
Years coverage
SINCE	2010	2013	2017	1997	1979	2017	2009	2019	2013	2011	2005	2004	2009	2006	2008 (Notivisa) 2018 (Vigimed)	2005	2013	2013	2005 (SCJ) 2010 (SCODES)	2015	2004	1987	1994 (SIASG) 2002 (SISME)	1999	1995	1997	2014	1982	1993	1986	2004	2013	2012	2012	2009	2009	2006	2015

## Sheet: S4-sugest
Table S3. Detailed classification of data sources, according to their accessibility, geographic granularity, type, setting, and initial year of release
	Acessibility							Geographic granularity3		Sector of data source			Type of data source				Setting of data source					Type of data			Years coverage
DATA SOURCES/Criteria	Publicly and conveniently accessible on line	Restricted pre-authorized protocol-only access	Access limited to or dependent on country-specific legislation - Freedom of Information Act	Available only researchers working in the institution (It is only people that is from the institution that provide the database)	The process for obtaining data is not clear, without general regulation	Not accessible any way/ Data not available for public use	Other	National	Regional (province, state, more than one city)	Public health system	Private sector	Both	Wholesaler	Pharmacy records	Patient records	Other (specify)	Ambulatorial	Hospital	Both (possible to separate)	Both (not possible to separate)	Other (specify)	Aggregate level	Individual level	Other	Since
AGHU		√							√	√					√					√			√		2010
APURASUS						√		√	√	√						5			√			√			2013
BNAFAR						√		√	√	√				√			√						√		2017
BPS	√							√				√				N/A - National Prices of medications approved by ANVISA					There is no distinction as to the destination of purchases. The purchases are made by the state and municipal institutions (Participation funds, prefectures, etc.) and made available in the bank with the identification of the purchasing institution.	√		Prices - not aplicable	1997
CIHA	√		√					√	√			√		√	√					√			√		1979
CMD	√							√	√	√						Procedures				√		√			2017
COAGULOPATIAS						√		√	√	√				√	√		√					√			2009
Conecte SUS - APP						√			√			√		√	√				√				√		2019
DATATOX				√				√	√			√				Notification from Toxicological Information Centers					N/A it is a system of notification	√			2013
e-SUS AB			√				1	√	√	√					√		√						√		2011
Farmácia Cidadã			√						√	√				√			√						√		2005
FARMÁCIA POPULAR			√					√	√	√				√			√					√			2004
HORUS			√					√	√	√				√			√						√		2009
Micronutrientes	√							√	√	√				√			√					√			2006
NOTIVISA/ VIGIMED	√		√					√	√			√				Notification from relatives, health professionals in all settings and patients are foreseen by Vigimed.			√			√	√		2008 (Notivisa) 2018 (Vigimed)
PERIweb			√	√					√			√				Notification from health professionals in all settings and Marketing Authorization Holder			√				√		2005
PNAUM	√							√	√			√				survey patients					survey patients		√		2013
PNS	√							√	√			√				survey patients					survey patients	√	√		2013
S-CODES				√					√			√				lawsuits			√			√		Lawsuits - not aplicable	2005 (SCJ) 2010 (SCODES)
SAMMED						√		√	√			√			√				√			√			2015
SI-PNI	√							√	√			√		√			√					√			2004
SIAFI			√	√				√	√	√						It involves documents to carry out all the processing, control and financial, patrimonial and accounting execution of the Brazilian federal government.					It involves documents to carry out all the processing, control and financial, patrimonial and accounting execution of the Brazilian federal government.	√		puchase system	1987
SIASG/SISME			√	√				√		√						Prices of medications					There is no distinction as to the destination of purchases. The purchases are made by the state and municipal institutions (Participation funds, prefectures, etc.) and made available in the bank with the identification of the purchasing institution.	√		purchase system	1994 (SIASG) 2002 (SISME)
SIASI						√			√	√					√					√		√			1999
SIA-SUS	√		√					√	√	√				√	√		√					√	√		1995
SICLOM			√					√	√	√				√						√		√			1997
SIGAF			√	√					√	√				√			√						√		2014
SIH-SUS	√		√					√	√	√					√			√				√	√		1982
SINAN	√		√					√	√			√				Surveillance system			√			√	√		1993
SINITOX	√							√	√			√				Notification from ToXicological Information Centers				√		√		Notification from ToXicological Information Centers	1986
SIOPS	√							√	√			√				Costs with health			√			√			2004
SISAB	√		√					√	√	√				√	√		√					√			2013
SISPRENATAL	√		√					√	√	√					√				√			√	√		2012
Site-TB			√					√	√	√					√					√			√		2012
Sivep-gripe	√							√	√			√				surveillance system			√				√		2009
SNGPC	√		√					√	√		√			√			√				Qualified professional prescription (doctor and dentist) provided in private sector pharmacies and drugstores	√	√		2009
VIGITEL	√						2	√	√			√				telephone survey with citizen					Collected in the homes of citizens It involves all kind of setting.	√			2006
VIVA BEM - APP						√		√	√			√		√	√	Mobile application by users			√				√		2015
	1. Health managers in all levels have access to data
	2. 2015 data in which we have information on medication use is not available yet.
	3. Omitted because there were no data sources identified: Municipality (one city); Organization multi-sited; Other (specify)
	5. Costs

## Sheet: TableS5
Table S5. The Uniform Resource Locator (URL) of all data sources selected.
Data source acronym	Website
AGHU	http://www2.ebserh.gov.br/web/aghu/inicio
APURASUS	Not found
BNAFAR	http://antigo.saude.gov.br/assistencia-farmaceutica/base-nacional-de-dados
BPS	http://bps.saude.gov.br/login.jsf
CIHA	https://datasus.saude.gov.br/transferencia-de-arquivos2/
CMD	https://datasus.saude.gov.br/transferencia-de-arquivos2/
Coagulopatias	http://coagulopatiasWeb.datasus.gov.br
Conecte SUS - app	https://conectesus-paciente.saude.gov.br/menu/home
Datatox	https://datatox2.abracit.org.br/datatox-2/login
e-SUS AB	https://aps.saude.gov.br/ape/esus
Farmácia Cidadã - Regula Saude	https://farmaciacidada.es.gov.br/farmacia-cidada-estadual (http://201.62.46.72/pacientes/login.action)
FARMÁCIA POPULAR	https://antigo.saude.gov.br/acoes-e-programas/farmacia-popular
HÓRUS	http://antigo.saude.gov.br/assistencia-farmaceutica/sistema-horus
Micronutrientes	https://sisaps.saude.gov.br/micronutrientes/
NOTIVISA/VIGIMED	http://antigo.anvisa.gov.br/notivisa AND http://antigo.anvisa.gov.br/vigimed https://www.gov.br/anvisa/pt-br/acessoainformacao/dadosabertos/informacoes-analiticas/notificacoes-de-farmacovigilancia
PERIweb	http://www.cvs.saude.sp.gov.br/eventos_adv.asp?x=todos
PNAUM	http://www.ufrgs.br/pnaum
PNS	http://datasus.saude.gov.br/pns-pesquisa-nacional-de-saude-2013/
S-CODES (old SCJ-SP)	http://codes.saude.sp.gov.br/LoginApp.aspx?caTimeout=1&caReqPath=http://codes.saude.sp.gov.br/inicial.aspx
SAMMED	https://sammed-web.anvisa.gov.br/
SI-PNI	https://datasus.saude.gov.br/acesso-a-informacao/imunizacoes-desde-1994/
SIAFI	https://siafi.tesouro.gov.br/
SIASG/SISME	http://www.comprasnet.gov.br/seguro/loginPortal.asp
SIASI	http://antigo.saude.gov.br/saude-indigena/gestao/siasi; https://www.youtube.com/watch?v=wcwflCr1c_M
SIA-SUS	https://datasus.saude.gov.br/transferencia-de-arquivos2/
SICLOM	http://azt.aids.gov.br/
SIGAF	http://sigaf.saude.mg.gov.br/
SIH-SUS	https://datasus.saude.gov.br/acesso-a-informacao/producao-hospitalar-sih-sus/
SINAN	https://datasus.saude.gov.br/transferencia-de-arquivos/
SINITOX	https://sinitox.icict.fiocruz.br/dados-nacionais
SIOPS	https://basedosdados.org/dataset/sistema-de-informacoes-sobre-orcamentos-publicos-em-saude-siops
SISAB	https://sisab.saude.gov.br/index.xhtml
SISPRENATAL WEB	http://datasus.saude.gov.br/transferencia-de-arquivos2/#
SITE-TB	http://sitetb.saude.gov.br/index.html
Sivep-gripe	http://plataforma.saude.gov.br/coronavirus/dados-abertos/
SNGPC	https://dados.gov.br/dataset?q=sngpc&sort=score+desc%2C+metadata_modified+desc
VIGITEL	https://datasus.saude.gov.br/informacoes-de-saude-tabnet/
VIVA BEM - APP	https://play.google.com/store/apps/details?id=br.gov.datasus.vivabem&hl=pt_BR

## Sheet: SuppTable5
Table S6. The access through the File Transfer Protocol (FTP) directory for some data sources
Custodean	Data source	FTP
SAES/MS	SIA - Sistema de Informações Ambulatoriais do SUS de 1994 a 2007	ftp://ftp.datasus.gov.br/dissemin/publicos/SIASUS/199407_200712/Dados/
SAES/MS	SIA - Sistema de Informações Ambulatoriais do SUS a partir de 2008	ftp://ftp.datasus.gov.br/dissemin/publicos/SIASUS/200801_/Dados/
SAES/MS	SIH - Sistema de Informações Hospitalares do SUS de 1992 a 2007	ftp://ftp.datasus.gov.br/dissemin/publicos/SIHSUS/199201_200712/Dados/
SAES/MS	SIH - Sistema de Informações Hospitalares do SUS a partir de 2008	ftp://ftp.datasus.gov.br/dissemin/publicos/SIHSUS/200801_/Dados/
SVS/MS	SIM - Sistema de Informações de Mortalidade - Declarações de Óbitos Fetais	ftp://ftp.datasus.gov.br/dissemin/publicos/SIM/CID10/DOFET/
SVS/MS	SIM - Sistema de Informações de Mortalidade	ftp://ftp.datasus.gov.br/dissemin/publicos/SIM/CID10/DORES/
SVS/MS	SINAN - Sistema de Informação de Agravos de Notificação	ftp://ftp.datasus.gov.br/dissemin/publicos/SINAN/DADOS/FINAIS/
SAPS/MS	SISAB - Sistema de Informação em Saúde para a Atenção Básica	ftp://ftp.datasus.gov.br/dissemin/publicos/CMD/DadosSISAB/
SVS/MS	SIPNI - Programa Nacional de Imunizações	ftp://ftp.datasus.gov.br/dissemin/publicos/PNI/DADOS/
SAES/MS	CNES - Cadastro Nacional de Estabelecimentos de Saúde	ftp://ftp.datasus.gov.br/dissemin/publicos/CNES/200508_/Dados/
